# Supplementary material for: A Web-Disseminated Self-Help and Peer Support Program Could Fill Gaps in Mental Health Care: Lessons From a Consumer Survey
Source: PubMed Central journal article supplement (PMC5290297; doi:10.2196/mental.4751), 2017-01-19
Supplement: mental_v4i1e5_app2.pdf [file mental_v4i1e5_app2.pdf]

Appendix Table 1. Regression predicting attitude score from all variables

| Step                           | Predictor                 | <i>B</i> | SE <i>B</i> | <i>P</i> | <i>R</i> <sup>2</sup> | $\Delta R^2$ | <i>D</i> <sub><i>m</i></sub> <sup><i>a</i></sup> | <i>P</i> |
|--------------------------------|---------------------------|----------|-------------|----------|-----------------------|--------------|--------------------------------------------------|----------|
| 1: Gender <sup>b</sup>         | Female                    | 0.271    | 0.098       | .006     | .0129                 |              | 3.84                                             | .02      |
|                                | Transgender               | 0.116    | 0.257       | .65      |                       |              |                                                  |          |
| 2: Race/ethnicity <sup>c</sup> | Hispanic                  | 0.356    | 0.205       | .08      | .0245                 | .0116        | 1.39                                             | .22      |
|                                | Black                     | 0.261    | 0.180       | .15      |                       |              |                                                  |          |
|                                | Asian                     | 0.201    | 0.225       | .37      |                       |              |                                                  |          |
|                                | Native American           | 0.591    | 0.467       | .21      |                       |              |                                                  |          |
|                                | Other                     | -0.083   | 0.238       | .73      |                       |              |                                                  |          |
| 3: Age                         | Age                       | -0.004   | 0.004       | .34      | .0260                 |              | 0.93                                             | .34      |
| 4: Socioeconomic status        | Income <sup>d</sup>       | -0.041   | 0.022       | .06      | .0372                 | .0110        | 3.39                                             | .03      |
|                                | Education                 | -0.039   | 0.035       | .263     |                       |              |                                                  |          |
| 5: Marital status <sup>e</sup> | Single                    | -0.095   | 0.104       | .36      | .0388                 | .0016        | 0.32                                             | .81      |
|                                | Separated/divorced        | -0.080   | 0.180       | .66      |                       |              |                                                  |          |
|                                | Widowed                   | -0.126   | 0.359       | .73      |                       |              |                                                  |          |
| 6: Symptoms                    | Brief Symptom Inventory   | 0.142    | 0.081       | .08      | .0439                 | .0051        | 3.0                                              | .08      |
| 7: Past treatment              | Ever used therapy         | 0.231    | 0.116       | .047     | .0553                 | .0114        | 3.47                                             | .03      |
|                                | Ever used medication      | 0.053    | 0.126       | .67      |                       |              |                                                  |          |
| 8. Hypothetical treatment      | Would consider therapy    | 0.581    | 0.117       | < .001   | .1139                 | .0586        | 18.84                                            | < .001   |
|                                | Would consider medication | 0.086    | 0.111       | .44      |                       |              |                                                  |          |

<sup>a</sup>*D*<sub>*m*</sub> is the model comparison statistic described by Meng and Rubin (1992).

<sup>b</sup>Reference category is male.

<sup>c</sup>Reference category is non-Hispanic White.

<sup>d</sup>Unit is income per household member<sup>1/2</sup> in \$10,000 increments.

<sup>e</sup>Reference category is married/cohabiting.

Appendix Table 2. Regression predicting attitude score with blocks omitted that did not improve fit

| Step                      | Predictor                 | <i>B</i> | SE <i>B</i> | <i>P</i> | <i>R</i> <sup>2</sup> | $\Delta R^2$ | <i>D</i> <sub><i>m</i></sub> <sup><i>a</i></sup> | <i>P</i> |
|---------------------------|---------------------------|----------|-------------|----------|-----------------------|--------------|--------------------------------------------------|----------|
| 1: Gender <sup>b</sup>    | Female                    | 0.271    | 0.098       | .006     | .0129                 |              | 3.84                                             | .02      |
|                           | Transgender               | 0.116    | 0.257       | .65      |                       |              |                                                  |          |
| 2: Socioeconomic status   | Income <sup>c</sup>       | -0.042   | 0.022       | .06      | .0255                 | .0126        | 4.14                                             | .02      |
|                           | Education                 | -0.044   | 0.034       | .20      |                       |              |                                                  |          |
| 3: Symptoms               | Brief Symptom Inventory   | 0.143    | 0.079       | .07      | .0310                 | .0055        | 3.28                                             | .07      |
| 4: Past treatment         | Ever used therapy         | 0.235    | 0.114       | .04      | .0406                 | .0096        | 2.89                                             | .06      |
|                           | Ever used medication      | -0.001   | 0.124       | .99      |                       |              |                                                  |          |
| 5. Hypothetical treatment | Would consider therapy    | 0.551    | 0.116       | < .001   | .0945                 |              | 17.30                                            | < .001   |
|                           | Would consider medication | 0.080    | 0.111       | .47      |                       |              |                                                  |          |

<sup>a</sup>*D*<sub>*m*</sub> is the model comparison statistic described by Meng and Rubin (1992).

<sup>b</sup>Reference category is male.

<sup>c</sup>Unit is income per household member<sup>1/2</sup> in \$10,000 increments.

Appendix Table 3. Logistic regression predicting intention to try CMH from all variables

| Step                           | Predictor               | <i>B</i> | SE <i>B</i> | <i>P</i> | <i>D</i> <sub><i>m</i></sub> <sup><i>a</i></sup> | <i>P</i> |
|--------------------------------|-------------------------|----------|-------------|----------|--------------------------------------------------|----------|
| 1: Gender <sup>b</sup>         | Female                  | 0.236    | 0.178       | .18      | 0.90                                             | .41      |
|                                | Transgender             | -0.008   | 0.462       | .99      |                                                  |          |
| 2: Race/ethnicity <sup>c</sup> | Hispanic                | 1.232    | 0.496       | .01      | 2.16                                             | .06      |
|                                | Black                   | 0.237    | 0.339       | .48      |                                                  |          |
|                                | Asian                   | 0.376    | 0.433       | .39      |                                                  |          |
|                                | Native American         | 0.184    | 0.873       | .83      |                                                  |          |
|                                | Other                   | -0.533   | 0.421       | .21      |                                                  |          |
| 3: Age                         | Age                     | -0.015   | 0.007       | .03      | 4.74                                             | .03      |
| 4: Socioeconomic status        | Income <sup>d</sup>     | -0.075   | 0.040       | .06      | 4.91                                             | .007     |
|                                | Education               | -0.119   | 0.065       | .07      |                                                  |          |
| 5: Marital status <sup>e</sup> | Single                  | -0.168   | 0.196       | .39      | 0.28                                             | .84      |
|                                | Separated/divorced      | -0.124   | 0.335       | .71      |                                                  |          |
|                                | Widowed                 | 0.103    | 0.6612      | .88      |                                                  |          |
| 6: Symptoms                    | Brief Symptom Inventory | 0.378    | 0.168       | .02      | 5.402                                            | .02      |
| 7: Past treatment              | Ever used therapy       | 0.067    | 0.222       | .76      | 0.13                                             | .88      |

|                           |                           |       |       |        |       |        |
|---------------------------|---------------------------|-------|-------|--------|-------|--------|
|                           | Ever used medication      | 0.046 | 0.241 | .84    |       |        |
| 8. Hypothetical treatment | Would consider therapy    | 0.951 | 0.233 | < .001 | 12.07 | < .001 |
|                           | Would consider medication | 0.075 | 0.223 | .74    |       |        |

<sup>a</sup> $D_m$  is the model comparison statistic described by Meng and Rubin (1992).

<sup>b</sup>Reference category is male.

<sup>c</sup>Reference category is non-Hispanic White.

<sup>d</sup>Unit is income per household member<sup>1/2</sup> in \$10,000 increments.

<sup>e</sup>Reference category is married/cohabiting.

Appendix Table 4. Logistic regression predicting intention to try CMH with blocks omitted that did not improve fit

| Step                           | Predictor                 | <i>B</i> | SE <i>B</i> | <i>P</i> | $D_m^a$ | <i>P</i> |
|--------------------------------|---------------------------|----------|-------------|----------|---------|----------|
| 1: Race/ethnicity <sup>b</sup> | Hispanic                  | 1.224    | 0.495       | .01      | 2.11    | .06      |
|                                | Black                     | 0.263    | 0.338       | .44      |         |          |
|                                | Asian                     | 0.366    | 0.846       | .40      |         |          |
|                                | Native American           | 0.194    | 0.871       | .82      |         |          |
|                                | Other                     | -0.499   | 0.420       | .23      |         |          |
| 2: Age                         | Age                       | -0.014   | 0.007       | .03      | 4.54    | .03      |
| 3: Socioeconomic status        | Income <sup>c</sup>       | -0.077   | 0.040       | .06      | 4.80    | .008     |
|                                | Education                 | -0.112   | 0.064       | .08      |         |          |
| 4: Symptoms                    | Brief Symptom Inventory   | 0.349    | 0.165       | .03      | 4.76    | .03      |
| 5. Hypothetical treatment      | Would consider therapy    | 0.915    | 0.227       | < .001   | 11.89   | < .001   |
|                                | Would consider medication | 0.038    | 0.218       | .86      |         |          |

<sup>a</sup> $D_m$  is the model comparison statistic described by Meng and Rubin (1992).

<sup>b</sup>Reference category is non-Hispanic White.

<sup>c</sup>Unit is income per household member<sup>1/2</sup> in \$10,000 increments.

Appendix Table 5. Logistic regression predicting provision of email from all variables

| Step                           | Predictor                 | <i>B</i> | SE <i>B</i> | <i>P</i> | $D_m^a$ | <i>P</i> |
|--------------------------------|---------------------------|----------|-------------|----------|---------|----------|
| 1: Gender <sup>b</sup>         | Female                    | 0.461    | 0.189       | .02      | 3.24    | .04      |
|                                | Transgender               | -0.181   | 0.564       | .75      |         |          |
| 2: Race/ethnicity <sup>c</sup> | Hispanic                  | 0.176    | 0.378       | .642     | 2.22    | .05      |
|                                | Black                     | 0.315    | 0.324       | .33      |         |          |
|                                | Asian                     | -1.35    | 0.622       | .03      |         |          |
|                                | Native American           | 1.42     | 0.877       | .11      |         |          |
|                                | Other                     | -0.219   | 0.462       | .64      |         |          |
| 3: Age                         | Age                       | 0.005    | 0.007       | .44      | 0.60    | .44      |
| 4: Socioeconomic status        | Income <sup>d</sup>       | -0.036   | 0.043       | .40      | 0.79    | .45      |
|                                | Education                 | -0.042   | 0.066       | .53      |         |          |
| 5: Marital status <sup>e</sup> | Single                    | -0.281   | 0.201       | .16      | 0.69    | .56      |
|                                | Separated/divorced        | -0.008   | 0.332       | .98      |         |          |
|                                | Widowed                   | -0.154   | 0.666       | .82      |         |          |
| 6: Symptoms                    | Brief Symptom Inventory   | 0.562    | 0.153       | < .001   | 13.46   | < .001   |
| 7: Past treatment              | Ever used therapy         | 0.324    | 0.223       | .15      | 1.93    | .14      |
|                                | Ever used medication      | 0.088    | 0.239       | .71      |         |          |
| 8. Hypothetical treatment      | Would consider therapy    | 0.905    | 0.253       | < .001   | 8.69    | < .001   |
|                                | Would consider medication | 0.008    | 0.229       | .971     |         |          |

<sup>a</sup> $D_m$  is the model comparison statistic described by Meng and Rubin (1992).

<sup>b</sup>Reference category is male.

<sup>c</sup>Reference category is non-Hispanic White.

<sup>d</sup>Unit is income per household member<sup>1/2</sup> in \$10,000 increments.

<sup>e</sup>Reference category is married/cohabiting.

Appendix Table 6. Logistic regression predicting provision of email with blocks omitted that did not improve fit

| Step                           | Predictor   | <i>B</i> | SE <i>B</i> | <i>P</i> | $D_m^a$ | <i>P</i> |
|--------------------------------|-------------|----------|-------------|----------|---------|----------|
| 1: Gender <sup>b</sup>         | Female      | 0.461    | 0.189       | .02      | 3.24    | .04      |
|                                | Transgender | -0.181   | 0.564       | .75      |         |          |
| 2: Race/ethnicity <sup>c</sup> | Hispanic    | 0.176    | 0.378       | .64      | 2.22    | .05      |

|                           |                           |        |       |        |       |        |
|---------------------------|---------------------------|--------|-------|--------|-------|--------|
|                           | Black                     | 0.315  | 0.324 | .33    |       |        |
|                           | Asian                     | -1.350 | 0.623 | .03    |       |        |
|                           | Native American           | 1.415  | 0.877 | .11    |       |        |
|                           | Other                     | -0.219 | 0.462 | .64    |       |        |
| 3: Symptoms               | Brief Symptom Inventory   | 0.487  | 0.146 | < .001 | 11.02 | < .001 |
| 4. Hypothetical treatment | Would consider therapy    | 0.911  | 0.247 | < .001 | 10.22 | < .001 |
|                           | Would consider medication | 0.055  | 0.221 | .80    |       |        |

<sup>a</sup> $D_m$  is the model comparison statistic described by Meng and Rubin (1992).

<sup>b</sup>Reference category is male.

<sup>c</sup>Reference category is non-Hispanic White.
